# Supplementary material for: Systematic screens of proteins binding to synthetic microRNA precursors
Source: PubMed Central journal article supplement — Nucleic Acids Res. 2012 Dec 5;41(3):e47. doi: 10.1093/nar/gks1197 (PMC3561989; doi:10.1093/nar/gks1197), 2012-12-05
Supplement: supp_gks1197_nar-01866-met-g-2012-File006.pdf [file supp_gks1197_nar-01866-met-g-2012-File006.pdf]

## Supplementary Data

**Table S1.** Screening set of pre-miRNAs. Sequences were retrieved from miRBase or published data. The oligoribonucleotides were chemically synthesized in biotinylated and non-biotinylated forms. BioTEG-Q is a biotin derivative with a tetraethyleneglycol type linker. See Material and Methods section for details.

| Designation    | Sequence (in 5' to 3' direction)                                                           |
|----------------|--------------------------------------------------------------------------------------------|
| hsa-let-7a-1   | UGAGGUAGUAGGUUGUAUAGUUUUAGGGUCACACCCACCACUCUGGGAGAUAAACUAUACAACUACUGUCUUUC[BioTEG-Q]       |
| hsa-let-7a-2   | UGAGGUAGUAGGUUGUAUAGUUUAGAAUUACAUCACAGGGAGAUAAACUGUACAGCCUCCUAGCUUUCC[BioTEG-Q]            |
| hsa-let-7c     | UGAGGUAGUAGGUUGUAUAGUUUAGAGUUACACCCUGGGAGUUAAACUGUACAACCUUACUAGCUUUCC[BioTEG-Q]            |
| hsa-let-7d     | AGAGGUAGUAGGUUGCAUAGUUUUAGGGCAGGAAUUUUGCCCACAAGGAGGUAAACUAUACGACCUUGCCUUUC[BioTEG-Q]       |
| hsa-let-7f-1   | UGAGGUAGUAGAUUGUAUAGUUGUGGGUAGUGAUUUUACCCUGUUCAGGAGAUAAACUAUACAACUUAUUGCCUUC[BioTEG-Q]     |
| hsa-let-7f-2   | UGAGGUAGUAGAUUGUAUAGUUUUAGGGUACUACCCCAUCUUGGAGAUAAACUAUACAGUCUACUGUCUUUC[BioTEG-Q]         |
| hsa-let-7g     | UGAGGUAGUAGUUUGUACAGUUUGAGGGUUCUAUGAUACCACCCGGUACAGGAGAUAAACUGUACAGGCCACUGCCUUGC[BioTEG-Q] |
| hsa-let-7i     | UGAGGUAGUAGUUUGUGUCUUGUGGUCGGGUUGGACAUUGCCCGCUGUGGAGAUAAACUGCGCAAGCUACUGCCUUGCU[BioTEG-Q]  |
| hsa-mir-101-1  | CAGUUUAUCACAGUCGUGAUGCUGUCUAUUUAAAGGUACAGUACUGUGAUAAACUGAA[BioTEG-Q]                       |
| hsa-mir-101-2  | CGGUUAUCAUGGUACCGAUGCUGUAUAUCUGAAAGGUACAGUACUGUGAUAAACUGAA[BioTEG-Q]                       |
| hsa-mir-103-1  | UCGGCUUCUUUACAGUCGUCUUGUUGCAUUGGAUCAAGCAGCAUUGUACAGGGCUAUGA[BioTEG-Q]                      |
| hsa-mir-106b   | UAAAGUGUCGACAGUCGAGUAGUGGUCCUCUCCGUGUCUACCCGACUUGUGGGUACUUGCUGC[BioTEG-Q]                  |
| hsa-mir-107    | UCAGCUUCUUUACAGUUGUCCUUGUGGCAUGGAGUUCAAGCAGCAUUGUACAGGGCUAUC[BioTEG-Q]                     |
| hsa-mir-10a    | UACCCUGUAGAUCCGAAUUUGUGUAAGGAAUUUUGUGGUCACAAUUCGUUACUAGGGGAAUA[BioTEG-Q]                   |
| hsa-mir-10b    | UACCCUGUAGAACCGAAUUUGUGUGGUUACCGUUAUAGUCACAGAUUCGAUUCUAGGGGAAUA[BioTEG-Q]                  |
| hsa-mir-1-2    | ACAUACUUCUUUUGUACCCAUUGAACAUAACAUGCUAUGGAAUGUAAAGAAUGAUUAU[BioTEG-Q]                       |
| hsa-mir-125b-1 | UCCCGAGACCCUAAACUUGUGAUUUUACCGUUUAAAUCCACGGGUUAGGCUCUUGGGAGCU[BioTEG-Q]                    |
| hsa-mir-128-1  | CGGGCCCGUAGCACUGUCUGAGAGGUUUACAUUUCACAGUGAACCGGUCUCUUU[BioTEG-Q]                           |
| hsa-mir-133a-1 | GCUGGUAAAUGGAACCAAUCGCCUCUCAAUGGAUUUGUCCCUUACACCAGCUG[BioTEG-Q]                            |
| hsa-mir-134    | UGUGACUGGUUAGCCAGAGGGCAUGCAGUCUGUUCACCCUGUGGGCCACCUAGUCACCAA[BioTEG-Q]                     |
| hsa-mir-135a-2 | UAUGGCUUUUUUUCUUAUGUGAUAGUAAUAAAGUCUUAUGUAGGGAUGGAAGCCAUAA[BioTEG-Q]                       |
| hsa-mir-136    | ACUCCAUUUUGUUUGAUUGAUUGGAUUUUUUAUGCUCUUAUCGUCUCAAUAGAGUCU[BioTEG-Q]                        |
| hsa-mir-137    | ACGGGUUUUUCUUGGGUGGAUAAUACGGAUUACGUUUUUAUGCUUAAAGAAUACGCGUAG[BioTEG-Q]                     |
| hsa-mir-138-2  | AGCUGGUGUUGUGAAUCAGCCGACGAGCAGCGCAUCCUUAUCCCGGCUUUUACGACACCAGGGUU[BioTEG-Q]                |
| hsa-mir-140    | CAGUGGUUUUACCCUUAUGGUAGGUUACGUACUGUCUUCUACACAGGGUAGAACCACGG[BioTEG-Q]                      |
| hsa-mir-142    | CAUAAAGUAGAAAGCACUACUAAACAGCACUGGAGGGUAGUGUUUCCUACUUUAUGGA[BioTEG-Q]                       |
| hsa-mir-147b   | GUGGAAACAUUUUCGCAACAACUAGAUUCUGGACACCAGUGUGCGGAAUUGCUUCUGCUA[BioTEG-Q]                     |
| hsa-mir-148a   | AAAGUUCUGAGACACUCCGACUCUGAGUAGAUAGAAGUCAGUGCACUACAGAACUUUGU[BioTEG-Q]                      |
| hsa-mir-153-2  | UCAUUUUUGUGAUUGGCGACUAGUAAUAGAGCCAGUUGCAUAGUCACAAAAGUGAUC[BioTEG-Q]                        |
| hsa-mir-15a    | UAGCAGCACAAUAGGUUUUGGGAUUUUUAAAAGGUGCAGGCCAUUUGUGUCGCCUCA[BioTEG-Q]                        |
| hsa-mir-16-1   | UAGCAGCACGAAAUAUUGGCGUUUAAAGAUUCUAAAUAUUCUCCAGUUAUAAACUGUCUGGAA[BioTEG-Q]                  |
| hsa-mir-181a-2 | AACAUUCAACGCUGUCGGUGAGUUUGGGAUUUGAAAACCACUGACCGUUGACUGUACC[BioTEG-Q]                       |
| hsa-mir-181b-1 | AACAUUCAUUGCUGUCGGUGGUGUAAACUGUGUGGACAAGCUCACUAAACAAGAAUGCAAC[BioTEG-Q]                    |
| hsa-mir-181c   | AACAUUCAACCGUCGGUGAGUUUGGGCAGCUCAGGCAAACCAUCGACCGUUGAGUGGAC[BioTEG-Q]                      |
| hsa-mir-18a    | UAAGGUGCAUCUAGUCGAGUAGUGAAGUAGAUUAGCAUCUACUGCCUAAAGUGCUCCUUCUGG[BioTEG-Q]                  |
| hsa-mir-18b    | UAAGGUGCAUCUAGUCGAGUAGUGAAGCAGCUUAGAAUCUACUGCCUAAAUGCCCUUCUGGC[BioTEG-Q]                   |
| hsa-mir-190    | UGAUUUGUUUGAUUAUAGGUUGUUUUUAAUCCAACUAUAUACAACAUUUUCU[BioTEG-Q]                             |
| hsa-mir-193b   | CGGGUUUUUGAGGGGAGAGUAGUUUUGUUUUUAAUCCAACUGGCCUCAAAGUCCCGCU[BioTEG-Q]                       |
| hsa-mir-196b   | UAGGUAGUUUCCUUGUUGGUAUCCACUUUCUCGACAGCAGCACACUGCCUUA[BioTEG-Q]                             |
| hsa-mir-19a    | AGUUUUGCAUAGUUGCACUACAAGAAGAAUAGUUGUGCAAUUCUAAUGCAAACUGA[BioTEG-Q]                         |
| hsa-mir-204    | UUCCUUUGUCAUCCUAGCCUGAGAAUUAUGAAGGAGGCGGGAAAGGCAAAGGACGU[BioTEG-Q]                         |
| hsa-mir-20b    | CAAAGUGCUCAUAGUCGAGUAGUUUUGGCAUGACUACUGUAGUAGGACUUCUCCAG[BioTEG-Q]                         |
| hsa-mir-21     | UAGCUUAUCAGACUGAUGUUGACUGUUAUCUCAUGGCAACACCAGUCGAUGGGCUGU[BioTEG-Q]                        |
| hsa-mir-214    | UGCCUGUCUACACUUGCUGGACAGAAUCCGCUCACCUUGUACAGCAGGCACAGACAGGCAGU[BioTEG-Q]                   |
| hsa-mir-22     | AGUUCUACAGUGGCAAGCUUUUAGUCCUGACCCAGCUAAAGCUGCCAGUUGAAGAACUGU[BioTEG-Q]                     |



**Table S2.** Sequences of forward (F) and reverse (R) PCR primers used for determination of miRNA precursors.

| <b>Name</b>   | <b>Sequence (all in 5' to 3' direction)</b> |
|---------------|---------------------------------------------|
| let7a1-pre-F  | GGTAGTAGGTTGTATAGTTTTAGGGTCA                |
| let7a1-pre-R  | AGATTGTATAGTTATCTCCCAGTGGT                  |
| let7a2-pre-F  | GGTTGTATAGTTTAGAATTACATCAAGG                |
| let7a2-pre-R  | GAAAGCTAGGAGGCTGTACAGTTA                    |
| let7c-pre-F   | GAGGTAGTAGGTTGTATGGTTTAGAGT                 |
| let7c-pre-R   | GGAAAGCTAGAAGGTTGTACAGTT                    |
| let7d-pre-F   | TTTAGGGCAGGGATTTTGC                         |
| let7d-pre-R   | AGAAAGGCAGCAGGTCGTAT                        |
| let7f-1-pre-F | GATTGTATAGTTGTGGGGTAGTGA                    |
| let7f-1-pre-R | GCAATAGATTGTATAGTTATCTCCTGA                 |
| let7f-2-pre-F | TGAGGTAGTAGATTGTATAGTTTTAGGG                |
| let7f-2-pre-R | GTAGACTGTATAGTTATCTCCAAGATGG                |
| let7g-pre-F   | CAGTTTGAGGGTCTATGATACCAC                    |
| let7g-pre-R   | GCAAGGCAGTGGCCTGTA                          |
| let7i-pre-F   | CTGTTGGTCGGGTTGTGAC                         |
| let7i-pre-R   | AGCTTGCCGAGTTATCTCCA                        |
| mir18a-pre-F  | GGTGCATCTAGTGCAGATAGTGA                     |
| mir18a-pre-R  | GAAGGAGCACTTAGGGCAGT                        |
| mir107-pre-F  | TCTCTGCTTTCAGCTTCTTTACAGT                   |
| mir107-pre-R  | GTACAATGCTGCTTGAACCTCCAT                    |

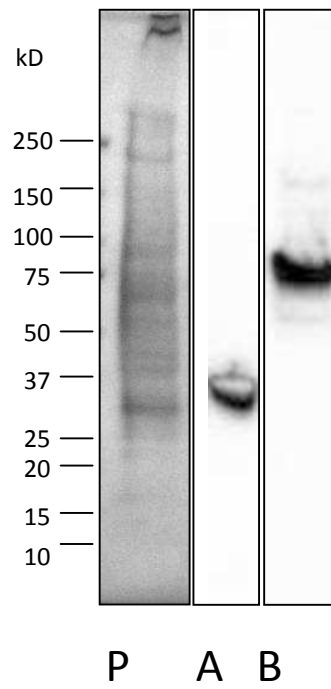

**Figure S1.** Western blots of HeLa lysate developed with antibodies against hnRNP A1, clone 3B10 (lane **A**) and against KSRP (polyclonal antibody, lane **B**). Molecular weight standards and a Ponceau stained lane (**P**) are shown. Lane A contained 5  $\mu$ g and lanes **B** and **P** 50  $\mu$ g of total lysate.

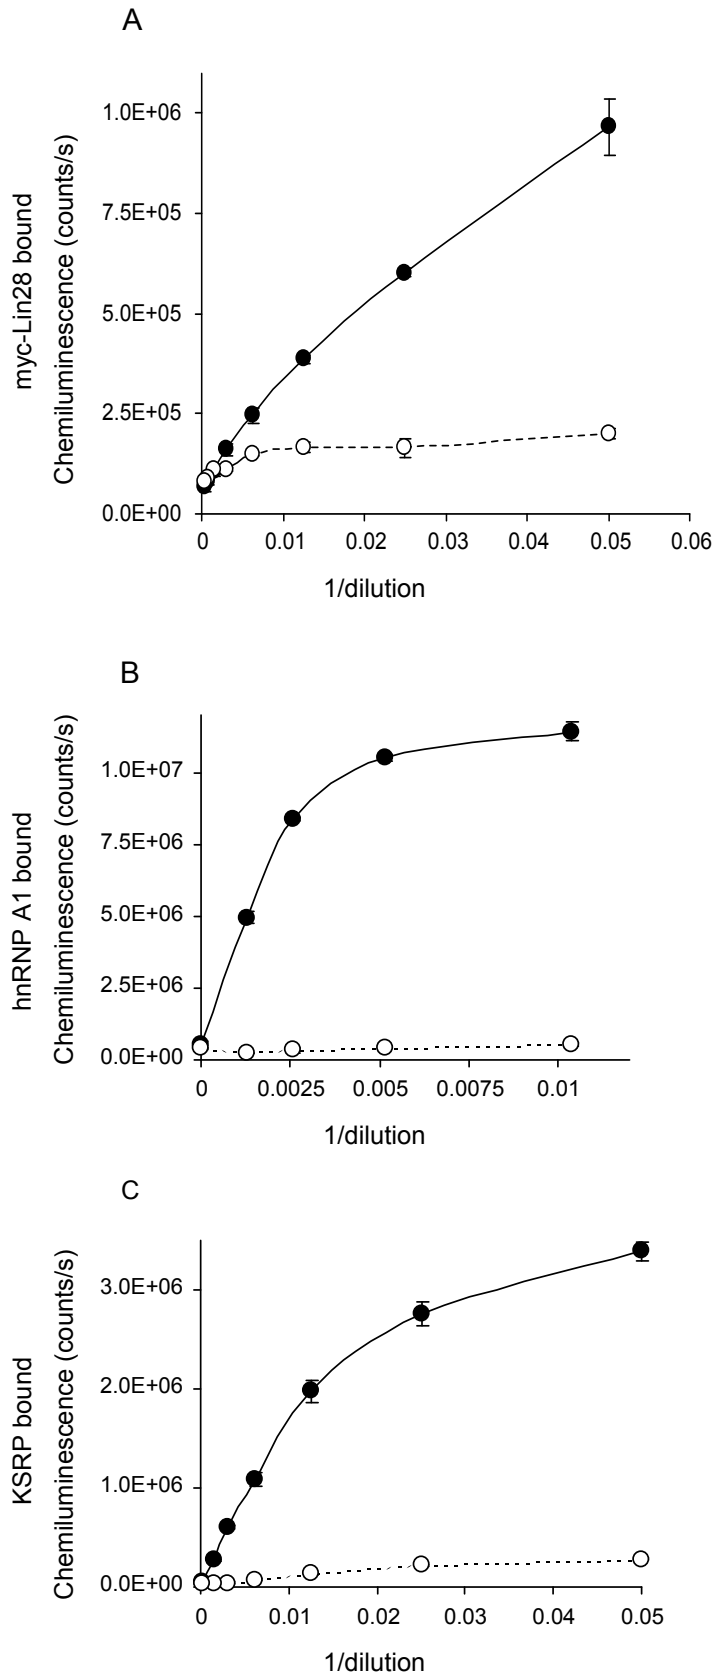

**Figure S2.** Examples of lysate titration curves. **(A)** Lin28 binding to biotinylated pre-let-7a-2. Source of Lin28 were lysates of HEK293T cells transfected with myc-Lin28 plasmid; detection with a myc-specific monoclonal antibody. **(B)** hnRNP A1 binding to biotinylated hnRNP A1 consensus sequence in HeLa cell lysates with detection by an hnRNP A1 specific monoclonal antibody. **(C)** KSRP binding to biotinylated pre-mir-1-2 in HeLa cell lysates with detection by a polyclonal antibody against KSRP. Filled symbols refer to signals of wells coated with streptavidin and biotinylated RNAs; open symbols represent signals of wells coated with streptavidin only. No backgrounds subtracted. Error bars are standard deviations (N=2-4).

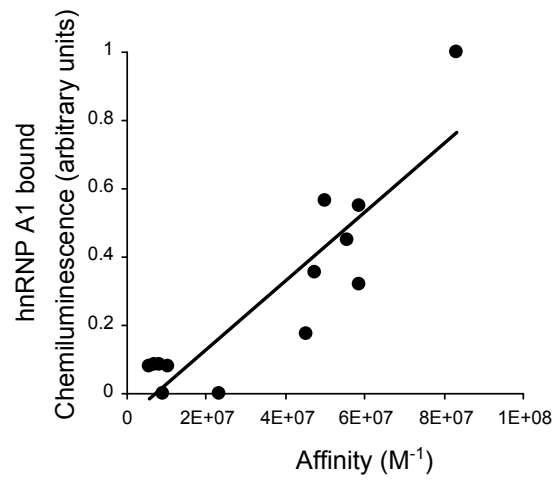

**Figure S3.** Correlation between signals of hnRNP A1 binding to immobilized biotinylated pre-miRNAs and affinity determined by competition assay. Data are taken from Figures 2C and 3. Affinity = 1/Kd. Kd-values that could not be determined (> 150 nM) were omitted from the analysis. The line indicates the linear least square regression line;  $R^2=0.795$  (Pearson correlation coefficient)..
